# Supplementary material for: Cx43 channels and signaling via IP3/Ca2+, ATP, and ROS/NO propagate radiation-induced DNA damage to non-irradiated brain microvascular endothelial cells
Source: PubMed Central journal article supplement (PMC7080808; doi:10.1038/s41419-020-2392-5), 2020-03-18
Supplement: 41419_2020_2392_MOESM1_ESM.pdf [file 41419_2020_2392_MOESM1_ESM.pdf]

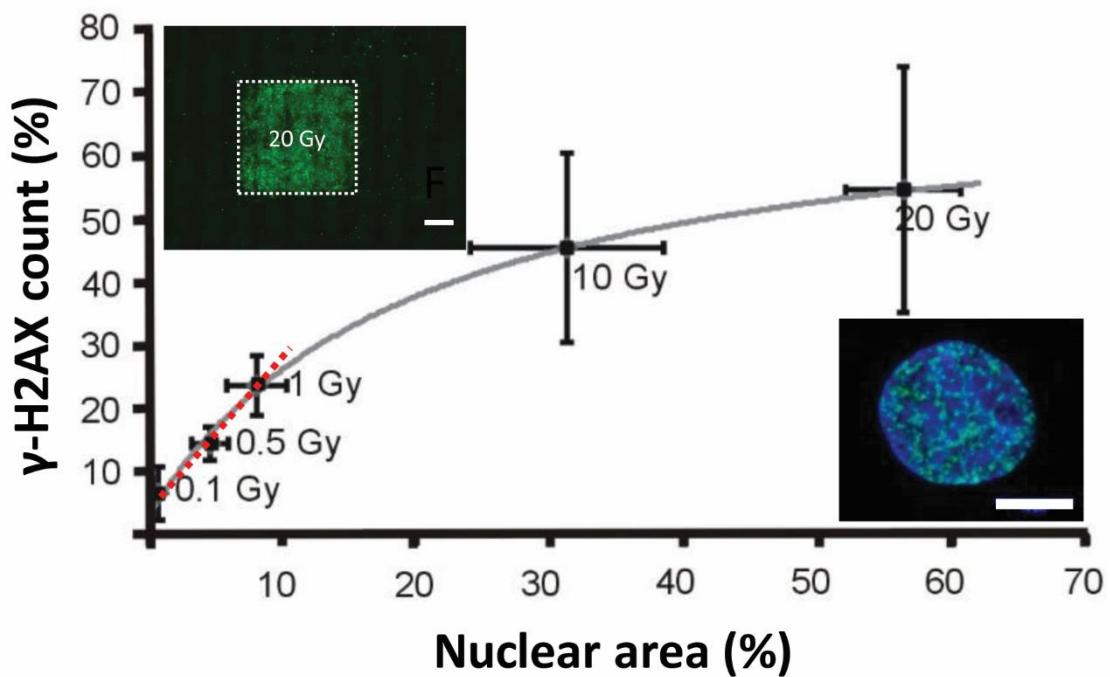

**Supplementary Figure 1: Relation between low and high magnification analysis of  $\gamma$ -H2AX foci counts in the irradiated zone.**

The y-axis shows  $\gamma$ -H2AX counts in the irradiated area determined from images recorded with a x10 objective (scale bar 1 mm) whereas the x-axis shows the percentage of  $\gamma$ -H2AX stained surface area relative to the nuclear surface area based on images acquired with a x63 objective (scale bar 10  $\mu$ m) ( $n = 2-3$ ). The relation is initially linear (red dotted line) and flattens at higher doses, resulting in an underestimation of the  $\gamma$ -H2AX counts in the irradiated zone for the 20 Gy dose.

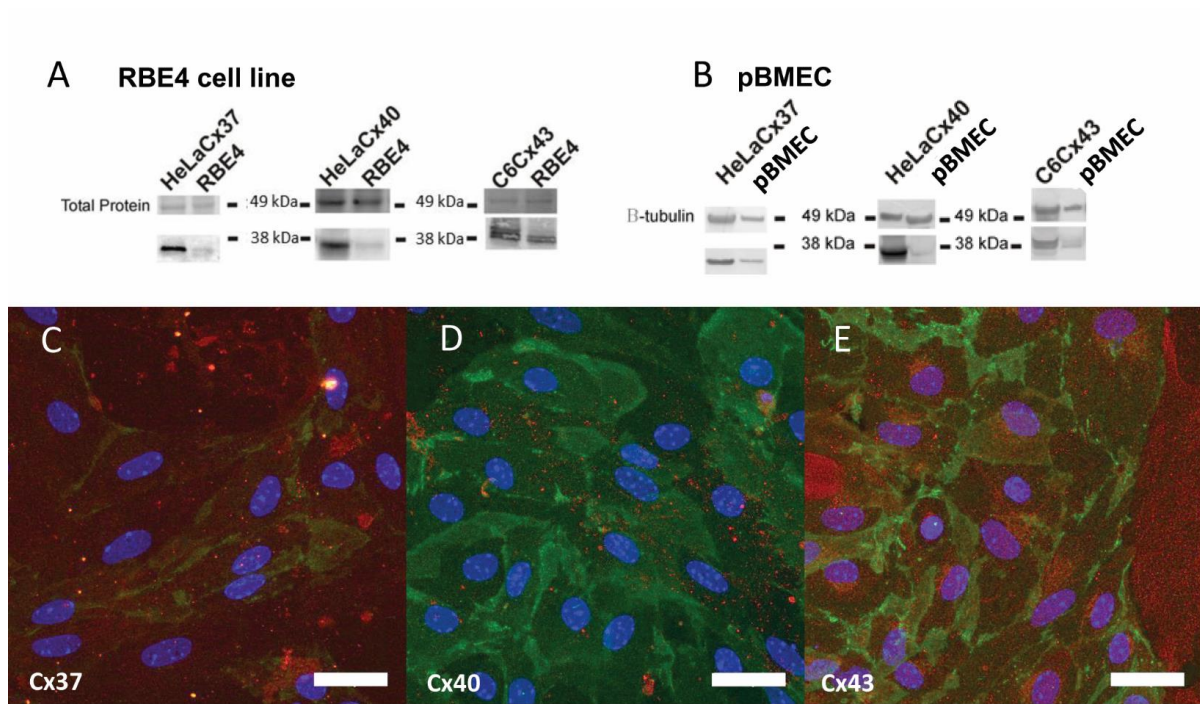

**Supplementary Figure 2: Connexin expression in brain microvascular endothelial cells.**

A. Western blotting analysis demonstrating Cx43, Cx40 and Cx37 expression in RBE4 cells. Total protein was determined by sypro staining. B. Primary BMECs, also expressed the three Cxs. Beta-tubulin was used as a loading control. C-E. Representative immunostainings demonstrating Cx37 (C), Cx40 (D) and Cx43 (E) in red, CD31 in green and DAPI nuclei in blue (scale bar 80  $\mu$ m).

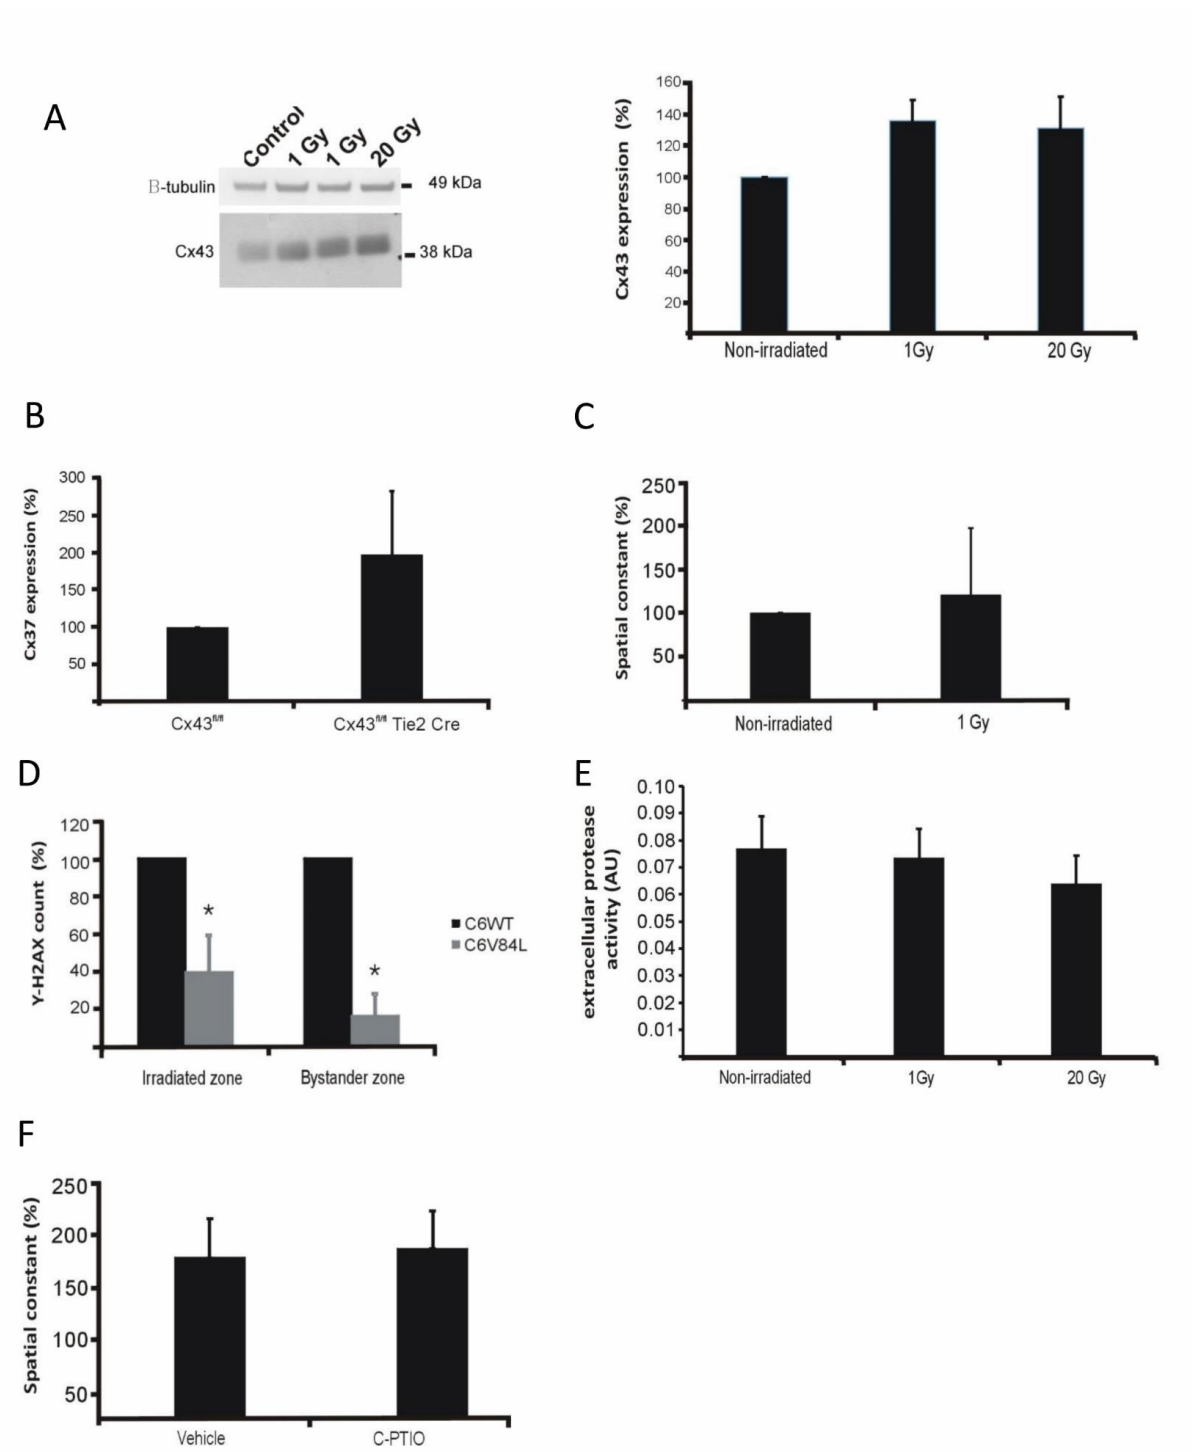

**Supplementary Figure 3: Connexin expression, gap junctional coupling and other control experiments**

A. Cx43 expression in RBE4 cells shows a trend to increase following irradiation with 1 and 20 Gy. B. Cx37 expression is increased in pBMECs isolated from C57BL/6 Cx43fl/fl:Tie2-Cre+ mice compared to Cx43fl/fl control animals (n = 6, not significant). C. Gap junctional coupling studied by scrape loading and dye transfer (SLDT) quantified by the spatial constant of 6-carboxyfluorescein dye spread (normalized to non-irradiated; n = 6). Irradiation with 1 Gy did not significantly alter dye spread. D. Experiments on C6 WT cells and stably expressing mutant Cx26 with reduced IP<sub>3</sub> permeability (C6V84L) (n = 7), demonstrating significantly reduced  $\gamma$ -H2AX counts in the irradiated and bystander areas. E. Extracellular protease activity (AU) in non-irradiated and broad-beam irradiated cells (1 and 20 Gy), 5 min post irradiation (n = 10). F. Gap junctional coupling quantified by the spatial constant of 6-carboxyfluorescein dye spread in cells treated with vehicle or 100  $\mu$ M C-PTIO (n = 7).
